# Supplementary material
Source: PubMed Central journal article supplement (PMC6495345)
Supplement: jamapsychiatry-76-474-s003.pdf [file jamapsychiatry-76-474-s003.pdf]

Comtois. Effect of augmenting standard care for military personnel with brief caring text messages for suicide prevention: a randomized clinical trial. *JAMA Psychiatry*. Published online February 13, 2019. doi:10.1001/jamapsychiatry.2018.4530

## **Data Sharing Statement**

### **Data**

**Data available:** No
